# Supplementary material
Source: PubMed Central journal article supplement (PMC6863189)
Supplement: 42770_2019_123_MOESM1_ESM.pdf [file 42770_2019_123_MOESM1_ESM.pdf]

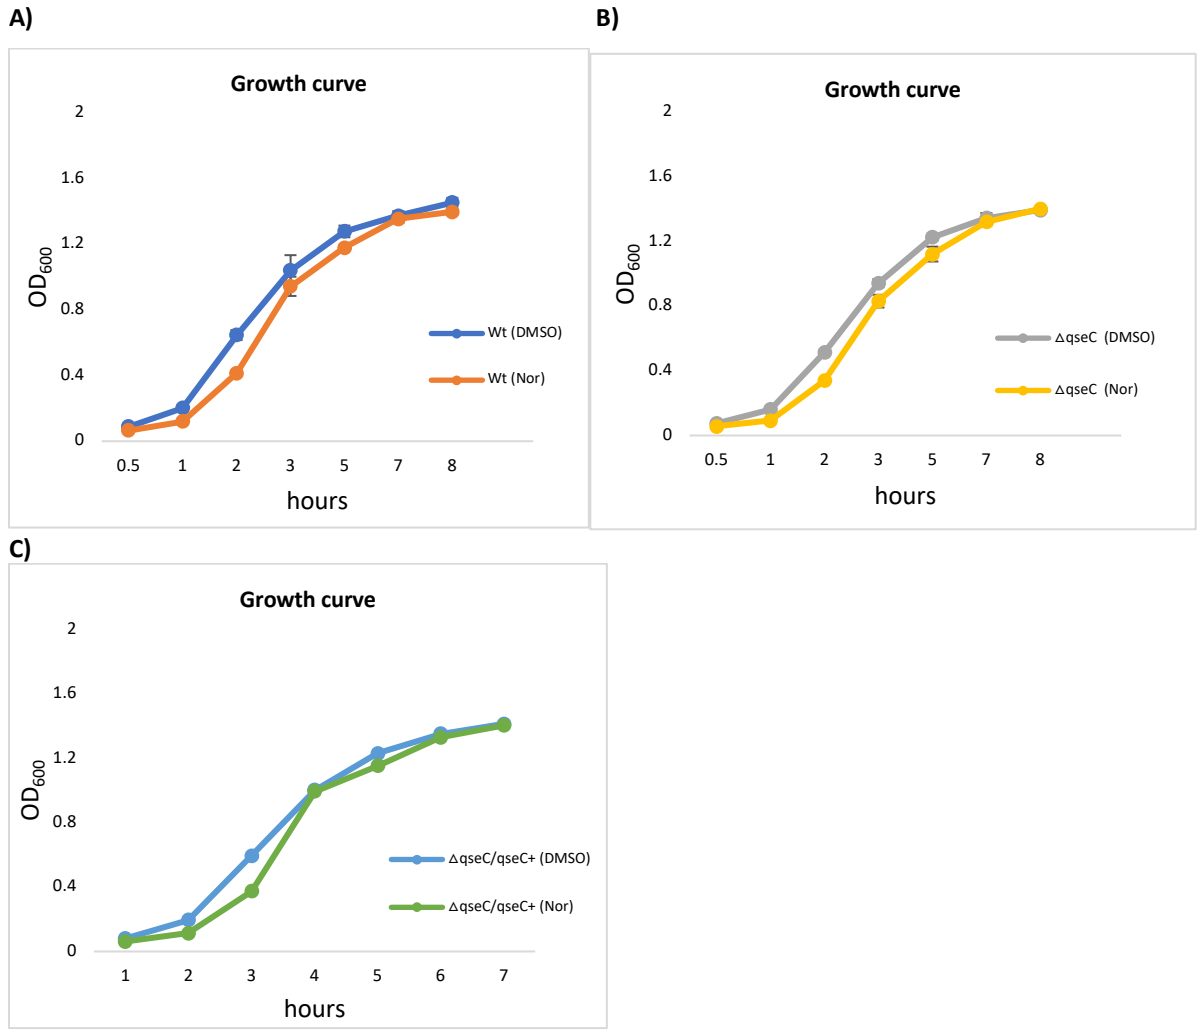

**Fig. S1.** Growth curve in presence of Norepinephrine 1 $\mu$ M in WT (A),  $\Delta qseC$  (B)  $\Delta qseC/qseC+$  (C) strains.

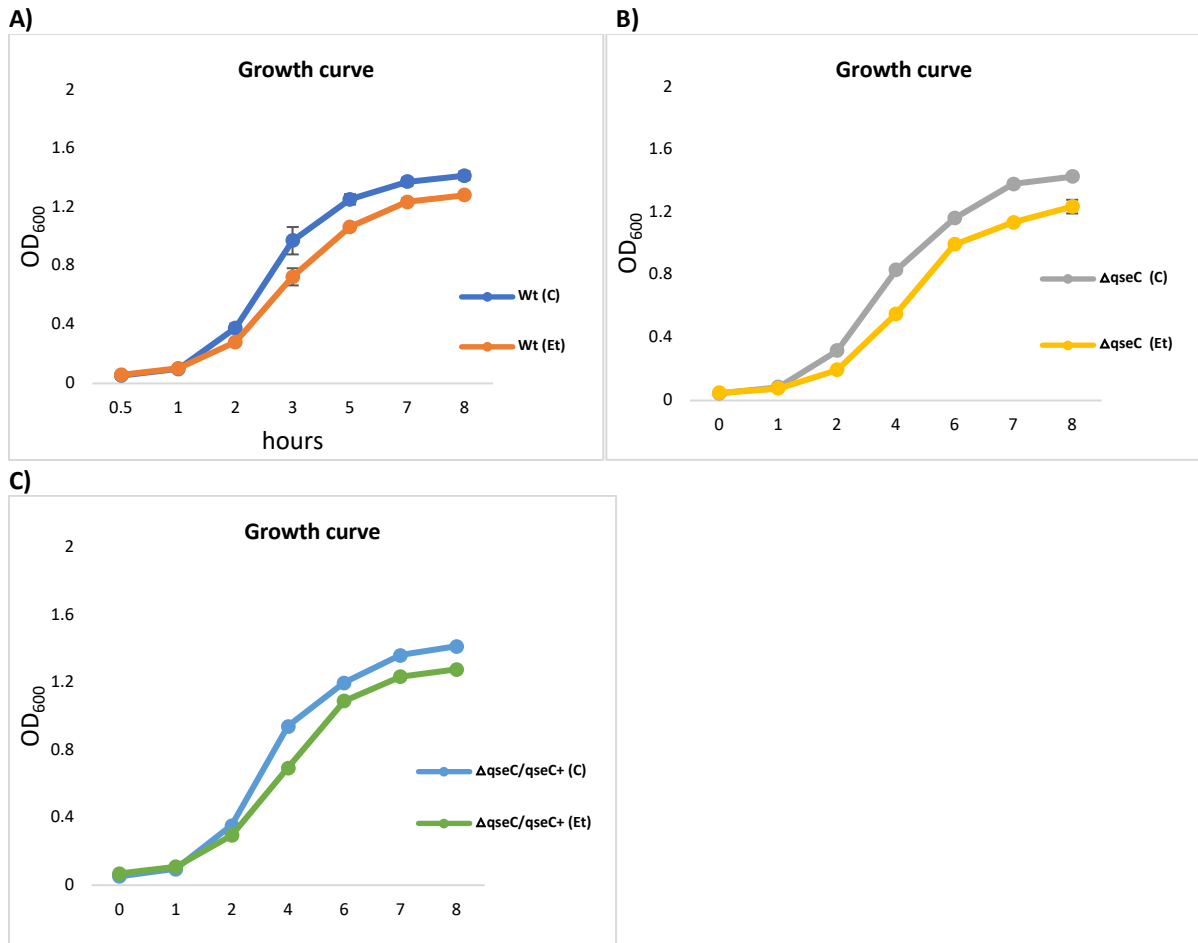

**Fig. S2.** Growth curve in presence of Ethanolamine 100μM in WT (A), *ΔqseC* (B) *ΔqseC/qseC+* (C) strains.
